# Supplementary material for: Lipidomic alterations in human saliva from cystic fibrosis patients
Source: PubMed Central journal article supplement (PMC9837121; doi:10.1038/s41598-022-24429-6), 2023-01-12
Supplement: 41598_2022_24429_MOESM1_ESM.pdf [file 41598_2022_24429_MOESM1_ESM.pdf]

## **Lipidomic alterations in human saliva from Cystic Fibrosis patients**

Marianna Caterino <sup>1,2</sup>, Roberta Fedele<sup>2</sup>, Vincenzo Carnovale<sup>3</sup>, Alice Castaldo<sup>3</sup>, Monica Gelzo<sup>1,2</sup>, Paola Iacotucci<sup>4</sup>, Margherita Ruoppolo<sup>1,2\*</sup> & Giuseppe Castaldo<sup>1,2</sup>

1. Department of Molecular Medicine and Medical Biotechnology, University of Naples Federico II, Naples, Italy;
2. CEINGE - Biotecnologie Avanzate F. Salvatore, s.c.ar.l., 80145 Napoli, Italy
3. Department of Translational Medical Sciences, University of Naples Federico II, Italy
4. Department of Clinical Medicine and Surgery, University of Naples Federico II, Naples, Italy, Italy

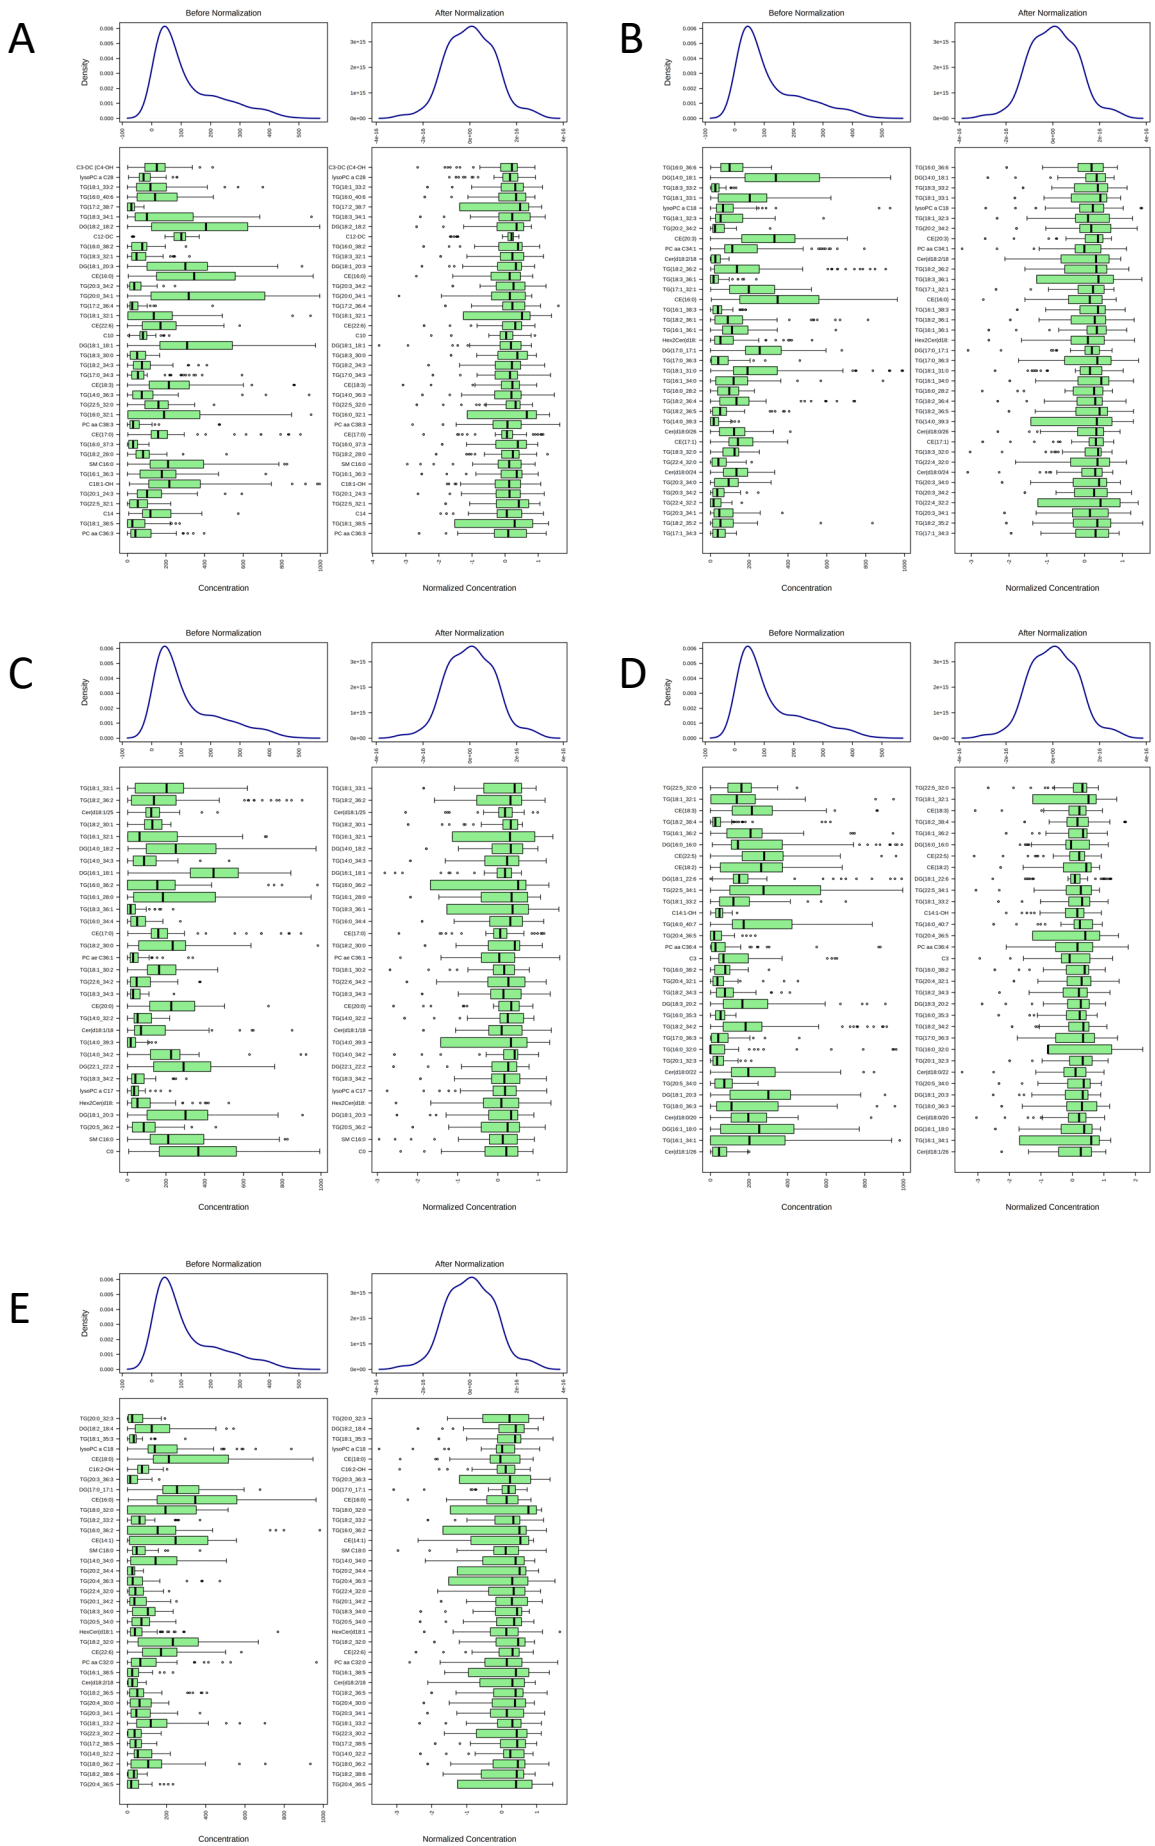

**Supplementary Figure 1.** Normalized distributions of lipids concentrations from A) CF\_notPA and CF\_PA; B) CF\_P\_SUF and CF\_INS; C) CF\_FEV\_mild and CF\_FEV\_severe; D) CF\_notLD and CF\_LD and E) CF\_noRD and CF\_RD datasets.

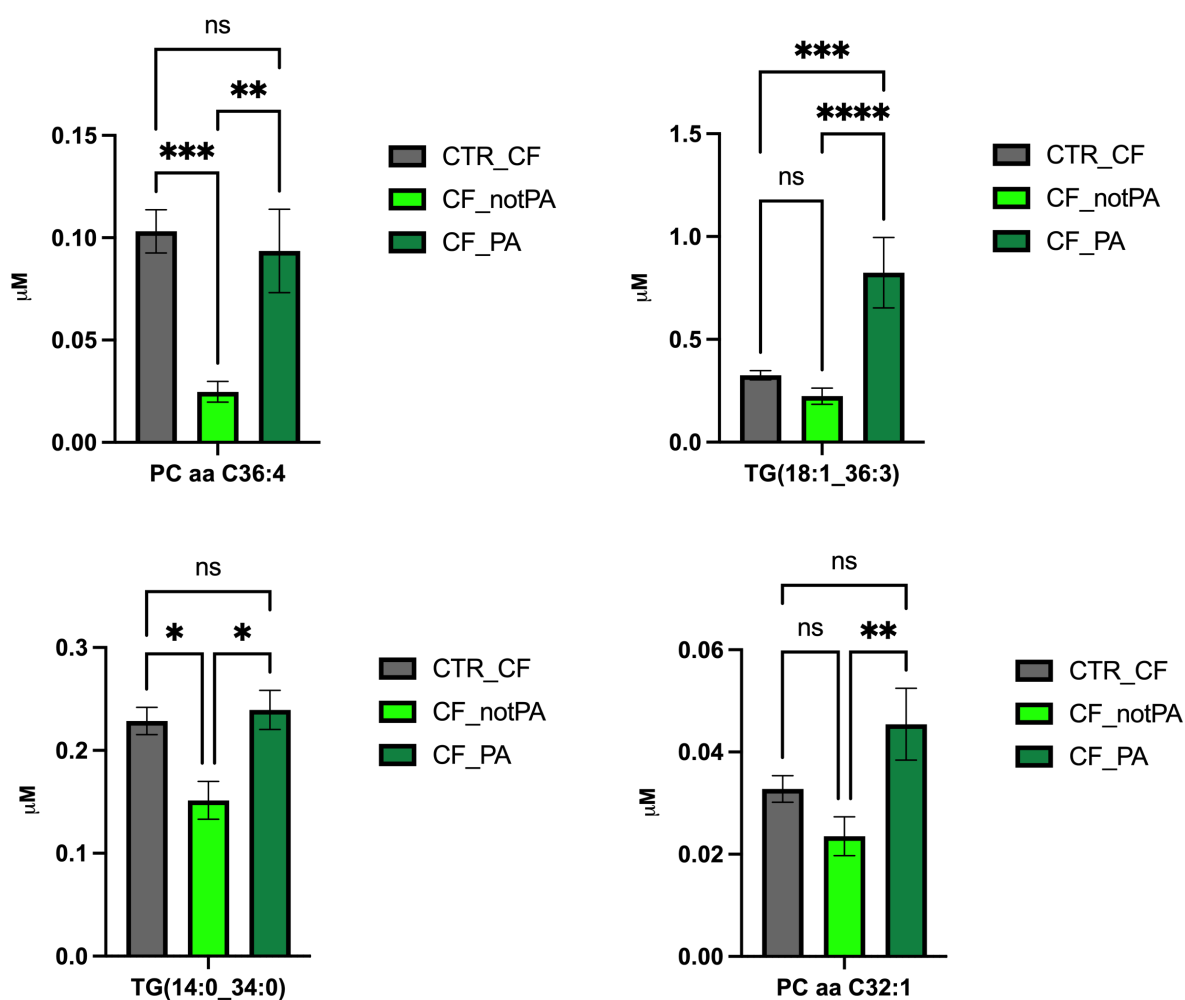

| Lipids        | Multiple comparisons test | Mean or Mean rank differences | Summary | Adjusted P Value |
|---------------|---------------------------|-------------------------------|---------|------------------|
| PC aa C36:4   | CTR_CF vs. CF_notPA       | 0,07839                       | ***     | 0,0007           |
|               | CTR_CF vs. CF_PA          | 0,009535                      | ns      | 0,8664           |
|               | CF_notPA vs. CF_PA        | -0,06886                      | **      | 0,0082           |
| TG(18:1_36:3) | CTR_CF vs. CF_notPA       | 0,1016                        | ns      | 0,6756           |
|               | CTR_CF vs. CF_PA          | -0,4992                       | ***     | 0,0001           |
|               | CF_notPA vs. CF_PA        | -0,6008                       | ****    | <0,0001          |
| PC aa C32:1   | CTR_CF vs. CF_notPA       | 0,00925                       | ns      | 0,2732           |
|               | CTR_CF vs. CF_PA          | -0,01266                      | ns      | 0,0825           |
|               | CF_notPA vs. CF_PA        | -0,02191                      | **      | 0,0046           |
| TG(14:0_34:0) | CTR_CF vs. CF_notPA       | 0,07709                       | **      | 0,007            |
|               | CTR_CF vs. CF_PA          | -0,0108                       | ns      | 0,877            |
|               | CF_notPA vs. CF_PA        | -0,08789                      | **      | 0,0056           |

**Supplementary Figure 2.** Significantly different lipid concentrations in CTR\_CF (healthy controls, n=64), CF\_notPA (patients without *P. aeruginosa* colonization, n=32) and CF\_PA (patients with *P. aeruginosa* colonization, n=38). Plots represent the original lipid concentrations (means  $\pm$  SD). Multiple comparison was performed by ordinary one-way ANOVA test and Hold-Sidak's multiple comparison test in normally distributed datasets and Kruskal-Wallis test and Dunn's multiple comparison test in not-normally distributed datasets. The normal distribution was verified according to D'Agostino Pearson test. The mean differences between original concentrations and the value of adjusted p-value were reported to each comparison.

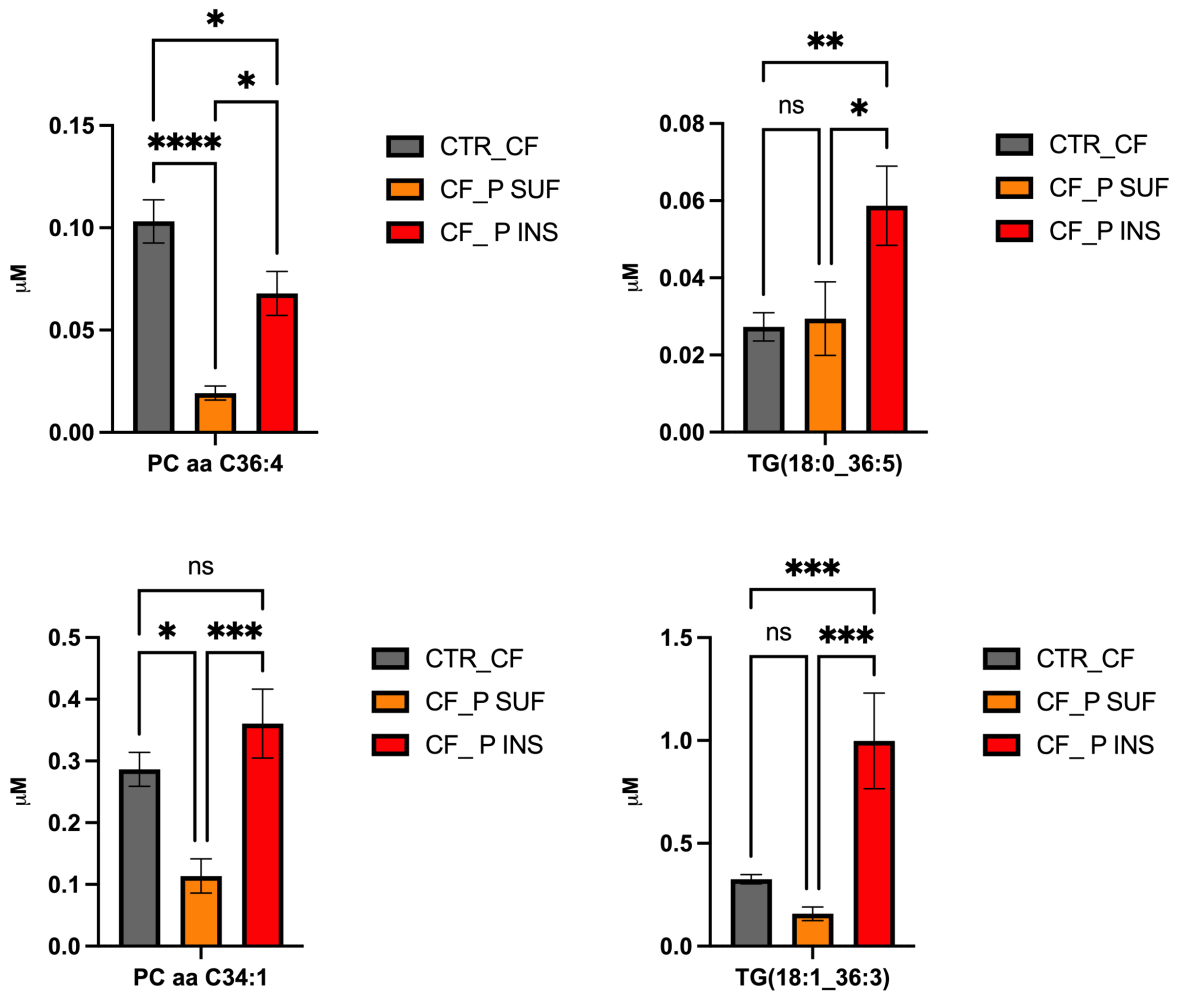

| Lipids        | Multiple comparisons test | Mean or Mean rank differences | Summary | Adjusted P Value |
|---------------|---------------------------|-------------------------------|---------|------------------|
| PC aa C36:4   | CTR_CF vs. CF_SUFF        | 0,08389                       | ****    | <0,0001          |
|               | CTR_CF vs. CF_INS         | 0,03522                       | *       | 0,0419           |
|               | CF_SUFF vs. CF_INS        | -0,04868                      | *       | 0,0254           |
| TG(18:0_36:5) | CTR_CF vs. CF_SUFF        | -0,002143                     | ns      | 0,9795           |
|               | CTR_CF vs. CF_INS         | -0,03139                      | **      | 0,0038           |
|               | CF_SUFF vs. CF_INS        | -0,02925                      | *       | 0,0395           |
| PC aa C34:1   | CTR_CF vs. CF_SUFF        | 0,1727                        | *       | 0,0126           |
|               | CTR_CF vs. CF_INS         | -0,07422                      | ns      | 0,3276           |
|               | CF_SUFF vs. CF_INS        | -0,2469                       | ***     | 0,0006           |
| TG(18:1_36:3) | CTR_CF vs. CF_SUFF        | 0,1675                        | ns      | 0,7114           |
|               | CTR_CF vs. CF_INS         | -0,6731                       | ***     | 0,0007           |
|               | CF_SUFF vs. CF_INS        | -0,8406                       | ***     | 0,0008           |

**Supplementary Figure 3.** Significantly different lipid concentrations in CTR\_CF (healthy controls, n=64), CF\_P\_SUF (patients with pancreatic sufficiency, n=28) and CF\_P\_INS (patients with pancreatic insufficiency, n=42). Plots represent the original lipid concentrations (means ± SD). Multiple comparison was performed by ordinary one-way ANOVA test and Hold-Sidak's multiple comparison test in normally distributed datasets and Kruskal-Wallis test and Dunn's multiple comparison test in not-normally distributed datasets. The normal distribution was verified according to D'Agostino Pearson test. The mean differences between original concentrations and the value of adjusted p-value were reported to each comparison.

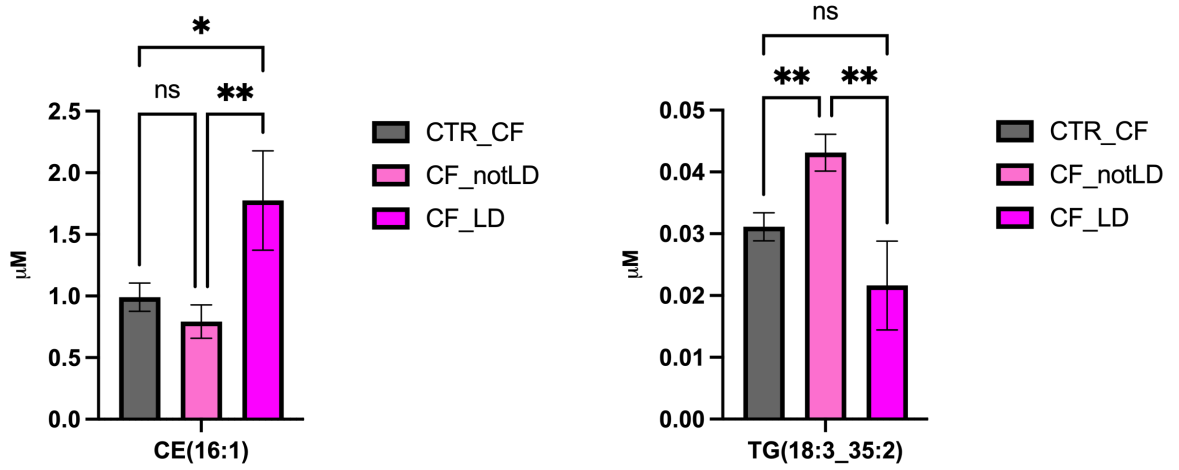

| Lipids        | Multiple comparisons test | Mean or Mean rank differences | Summary | Adjusted P Value |
|---------------|---------------------------|-------------------------------|---------|------------------|
| CE 16:1       | CTR_CF vs. CF_notLD       | 0,1981                        | ns      | 0,53             |
|               | CTR_CF vs. CF_LD          | -0,7846                       | *       | 0,0396           |
|               | CF_notLD vs. CF_LD        | -0,9827                       | **      | 0,0074           |
| TG(18:3_35:2) | CTR_CF vs. CF_notLD       | -0,01201                      | **      | 0,0061           |
|               | CTR_CF vs. CF_LD          | 0,009493                      | ns      | 0,2782           |
|               | CF_notLD vs. CF_LD        | 0,0215                        | **      | 0,0027           |

Supplementary Figure 4. Significantly different lipid concentrations in CTR\_CF (healthy controls, n=64), CF\_notLD (patients without liver disease, n=58) and CF\_LD (patients with liver disease, n=12). Plots represent the original lipid concentrations (means  $\pm$  SD). Multiple comparison was performed by ordinary one-way ANOVA test and Hold-Sidak's multiple comparison test in normally distributed datasets and Kruskal-Wallis test and Dunn's multiple comparison test in not-normally distributed datasets. The normal distribution was verified according to D'Agostino Pearson test. The mean differences between original concentrations and the value of adjusted p-value were reported to each comparison.

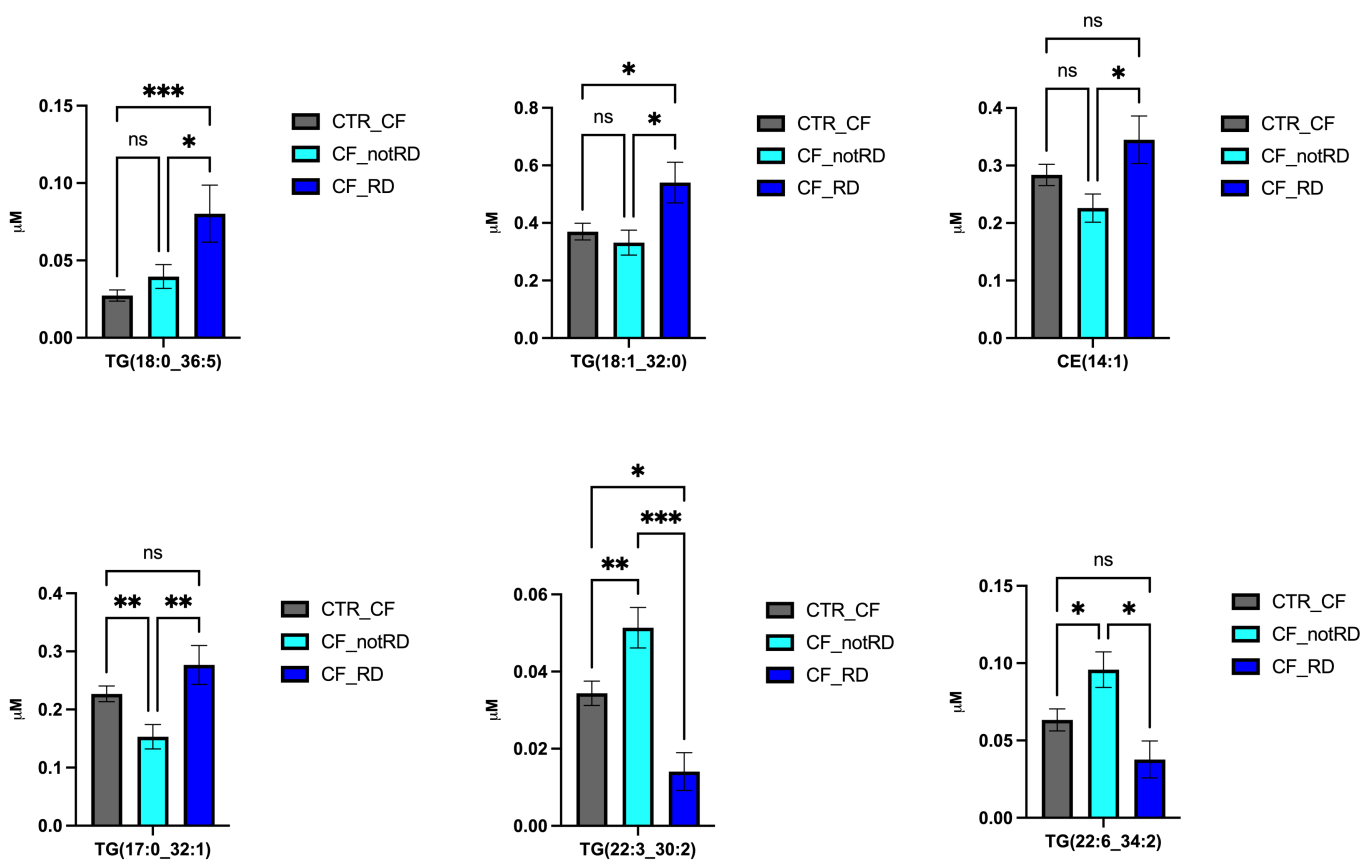

| Lipids        | Multiple comparisons test | Mean or Mean rank differences | Summary | Adjusted P Value |
|---------------|---------------------------|-------------------------------|---------|------------------|
| TG(18:0_36:5) | CTR_CF vs. CF_notRD       | -0,01218                      | ns      | 0,3653           |
|               | CTR_CF vs. CF_RD          | -0,05295                      | ***     | 0,0004           |
|               | CF_notRD vs. CF_RD        | -0,04077                      | *       | 0,01             |
| TG(18:1_32:0) | CTR_CF vs. CF_notRD       | 0,03809                       | ns      | 0,4558           |
|               | CTR_CF vs. CF_RD          | -0,1706                       | *       | 0,0464           |
|               | CF_notRD vs. CF_RD        | -0,2087                       | *       | 0,0222           |
| CE 14:1       | CTR_CF vs. CF_notRD       | 0,05766                       | ns      | 0,1397           |
|               | CTR_CF vs. CF_RD          | -0,06124                      | ns      | 0,3734           |
|               | CF_notRD vs. CF_RD        | -0,1189                       | *       | 0,0304           |
| TG(17:0_32:1) | CTR_CF vs. CF_notRD       | 0,07378                       | **      | 0,008            |
|               | CTR_CF vs. CF_RD          | -0,0498                       | ns      | 0,3658           |
|               | CF_notRD vs. CF_RD        | -0,1236                       | **      | 0,0034           |
| TG(22:3_30:2) | CTR_CF vs. CF_notRD       | -0,01701                      | **      | 0,0072           |
|               | CTR_CF vs. CF_RD          | 0,02029                       | *       | 0,0332           |
|               | CF_notRD vs. CF_RD        | 0,03729                       | ***     | 0,0005           |
| TG(22:6_34:2) | CTR_CF vs. CF_notRD       | -0,03235                      | *       | 0,0327           |
|               | CTR_CF vs. CF_RD          | 0,02555                       | ns      | 0,4664           |
|               | CF_notRD vs. CF_RD        | 0,0579                        | *       | 0,025            |

**Supplementary Figure 5.** Significantly different lipid concentrations in CTR\_CF (heathy controls, n=64), CF\_notRD (patients without diabetes, n=54) and CF\_RD (patients with diabetes, n=16). Plots represents the original lipid concentrations (means  $\pm$  SD). Multiple comparison was performed by ordinary one-way ANOVA test and Hold-Sidak's multiple comparison test in normally distributed datasets and Kruskal-Wallis test and Dunn's multiple comparison test in not-normally distributed datasets. The normal distribution was verified according to D'Agostino Pearson test. The mean differences between original concentrations and the value of adjusted p-value were reported to each comparison.
